# Supplementary material for: Predictors of 30-day unplanned hospital readmission among adult patients with diabetes mellitus: a systematic review with meta-analysis
Source: PubMed Central journal article supplement — BMJ Open Diabetes Res Care. 2020 Aug 11;8(1):e001227. doi: 10.1136/bmjdrc-2020-001227 (PMC7418689; doi:10.1136/bmjdrc-2020-001227), 2020-08-11
Supplement: bmjdrc-2020-001227supp001.pdf [file bmjdrc-2020-001227supp001.pdf]

### Appendix 1: Embase

New
 Edit
 Delete

Jade Soh

- DM Readmission Risk Factors 15 O
- SR on DM readmission Only

Edit
 Rerun
 Delete
 View Details
 Set Email Alert
 Set RSS Feed

|                          | Your Query                                                                                                                                                                                                                                                                                                                                                                                                                                                                                                                                                                                                                               | Name | Last Update | Creation Date | Results |
|--------------------------|------------------------------------------------------------------------------------------------------------------------------------------------------------------------------------------------------------------------------------------------------------------------------------------------------------------------------------------------------------------------------------------------------------------------------------------------------------------------------------------------------------------------------------------------------------------------------------------------------------------------------------------|------|-------------|---------------|---------|
| <input type="checkbox"/> | #9 #8 AND ('Article'/it OR 'Article in Press'/it OR 'Review'/it)                                                                                                                                                                                                                                                                                                                                                                                                                                                                                                                                                                         |      | 2018-10-15  | 2018-10-15    | 684     |
| <input type="checkbox"/> | #8 #7 AND ('case control study'/de OR 'clinical article'/de OR 'clinical study'/de OR 'clinical trial'/de OR 'cohort analysis'/de OR 'comparative study'/de OR 'controlled clinical trial'/de OR 'controlled study'/de OR 'major clinical study'/de OR 'medical record review'/de OR 'multicenter study'/de OR 'observational study'/de OR 'outcomes research'/de OR 'prospective study'/de OR 'randomized controlled trial'/de OR 'randomized controlled trial (topic)'/de OR 'retrospective study'/de OR 'total quality management'/de) AND ('diabetes mellitus'/de OR 'obesity'/de) AND (30:ti,ab OR '4 week*':ti,ab OR '4 wk':ti,ab) |      | 2018-10-15  | 2018-10-15    | 1342    |
| <input type="checkbox"/> | #7 #3 AND #6                                                                                                                                                                                                                                                                                                                                                                                                                                                                                                                                                                                                                             |      | 2018-10-15  | 2018-10-15    | 5294    |

---

Edit
 Rerun
 Delete
 View Details
 Set Email Alert
 Set RSS Feed

|                          | Your Query                                                                                                | Name | Last Update | Creation Date | Results |
|--------------------------|-----------------------------------------------------------------------------------------------------------|------|-------------|---------------|---------|
| <input type="checkbox"/> | #6 #4 OR #5                                                                                               |      | 2018-10-15  | 2018-10-15    | 60698   |
| <input type="checkbox"/> | #5 'hospital readmission'/exp                                                                             |      | 2018-10-15  | 2018-10-15    | 46460   |
| <input type="checkbox"/> | #4 readmission*:ti,ab OR 're admission*':ti,ab OR rehospitalization*:ti,ab OR 're hospitalization*':ti,ab |      | 2018-10-15  | 2018-10-15    | 49004   |
| <input type="checkbox"/> | #3 #1 OR #2                                                                                               |      | 2018-10-15  | 2018-10-15    | 1019348 |
| <input type="checkbox"/> | #2 diabet*:ti,ab OR 'glucose intoleran*':ti,ab                                                            |      | 2018-10-15  | 2018-10-15    | 836127  |
| <input type="checkbox"/> | #1 'diabetes mellitus'/exp                                                                                |      | 2018-10-15  | 2018-10-15    | 874490  |

## Appendix 2: Medline

| #  | Searches                                                                            | Results | Type     | Actions              | Annotations |
|----|-------------------------------------------------------------------------------------|---------|----------|----------------------|-------------|
| 10 | 8 and 9                                                                             | 447     | Advanced | Display Results More | Contract    |
| 9  | (*30* or *4 week** or *4 wk*).it.ab.                                                | 1266054 | Advanced | Display Results More |             |
| 8  | 3 and 6                                                                             | 1167    | Advanced | Display Results More |             |
| 7  | 3 and 6 and (*30* or *4 week** or *4 wk*).it.ab.                                    | 447     | Advanced | Display Results More |             |
| 6  | 4 or 5                                                                              | 23655   | Advanced | Display Results More |             |
| 5  | (readmission* or re-admission* or rehospitalization* or re-hospitalization*).it.ab. | 18450   | Advanced | Display Results More |             |
| 4  | Patient Readmission/                                                                | 13775   | Advanced | Display Results More |             |
| 3  | 1 or 2                                                                              | 555660  | Advanced | Display Results More |             |
| 2  | (diabet* or *Glucose Intolerance*).it.ab.                                           | 496872  | Advanced | Display Results More |             |
| 1  | exp Diabetes Mellitus/                                                              | 390493  | Advanced | Display Results More |             |

## Appendix 3: CINAHL

| Search ID# | Search Terms                                                                                                                                                                                         | Search Options                | Actions                 |
|------------|------------------------------------------------------------------------------------------------------------------------------------------------------------------------------------------------------|-------------------------------|-------------------------|
| S6         | ( S1 AND S2 ) AND ( 30 OR *4 week\$* or *4 wk\$* )                                                                                                                                                   | Search modes - Boolean/Phrase | Rerun View Details Edit |
| S5         | ( S1 AND S2 ) AND ( 30 OR *4 week\$* or *4 wk\$* )                                                                                                                                                   | Search modes - Boolean/Phrase | Rerun View Details Edit |
| S4         | ( S1 AND S2 ) AND ( 30 OR *4 week\$* or *4 wk\$* )                                                                                                                                                   | Search modes - Boolean/Phrase | Rerun View Details Edit |
| S3         | S1 AND S2                                                                                                                                                                                            | Search modes - Boolean/Phrase | Rerun View Details Edit |
| S2         | (MH "Diabetes Mellitus") OR TI ( diabet* OR "glucose intoleran*" ) AND AB ( diabet* OR "glucose intoleran*" )                                                                                        | Search modes - Boolean/Phrase | Rerun View Details Edit |
| S1         | (MM "Readmission") OR TI ( readmission* OR "re admission*" OR rehospitalization* OR "re hospitalization*" ) OR AB ( readmission* OR "re admission*" OR rehospitalization* OR "re hospitalization*" ) | Search modes - Boolean/Phrase | Rerun View Details Edit |
